# Supplementary material
Source: Springer Nature journal article supplement (https://www.springermedizin.de/resource/supplementary/12968_2008_45_MOESM3_ESM.pdf/9577860)

apical

medial

basal

LAD/LCX

Stress  
PERF

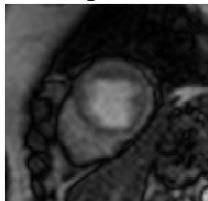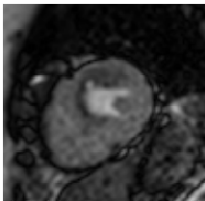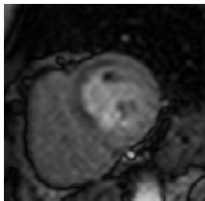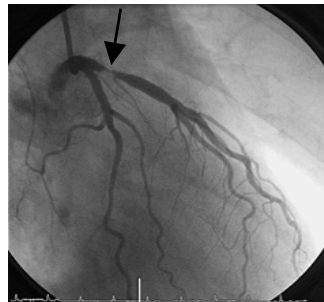

Rest  
PERF

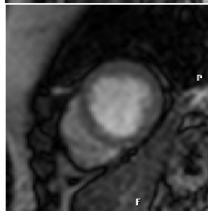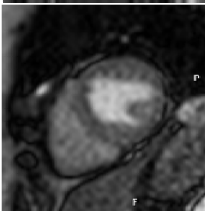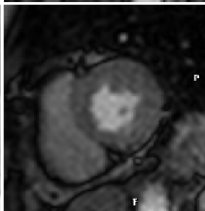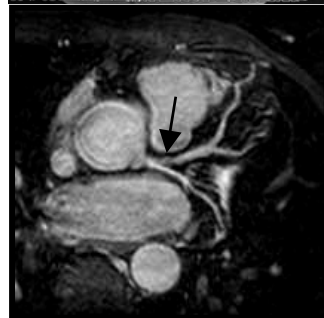

DE

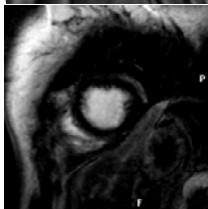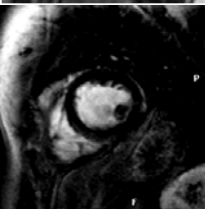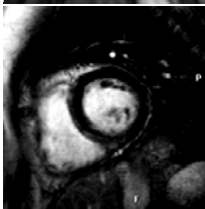

Supplement: MOESM3 [file 9577860]
